# Supplementary material
Source: Elsevier journal article supplement (https://www.sciencedirect.com/science/article/pii/S217357861830012X)
Supplement: mmc1 [file S217357861830012X:mmc1.pdf]

## A mis hijos

Muchas veces os he contado episodios de mi proceso en la guerra civil. Ahora he reunido aquí ordenadamente toda su documentación.

Más allá de las puertas de nuestra casa esta pequeña historia no tiene más importancia que una gota de agua en el ancho mar de las injusticias humanas. Pero la tiene grandísima para mí, pues ningún recuerdo de la vida me produce tanta satisfacción al ser evocado en la intimidad de mi conciencia o referido ante vosotros como el de mi conducta durante aquellos tiempos críticos, cuyas consecuencias, paradójicamente muy desfavorables, se han prolongado en nuestra familia, aunque atenuándose gradualmente, hasta hoy mismo.

Siempre han corrido riesgo de convertirse en manías, o de ser interpretados como tales, los temas de los viejos, y algo de esto ocurre probablemente conmigo, quizá con razón; disculpo por ello de antemano si, a pesar de vuestra probada adhesión filial, os resulta este tema aburrido y antipático por su reiteración y anacronismo. A pesar de ello, os pido que leáis detenidamente estas páginas. Procuraré en cambio no recaer en adelante en esta manía.



## S E N T E N C I A

D. Valeriano Peña González, Secretario Habilitado del Juzgado Militar nº 1.-

CERTIFICO: Que en procedimiento sumarísimo de urgencia nº 53 se dictó la resolución del tenor literal siguiente:

SENTENCIA.- En la ciudad de Bilbao, a 30 de junio de 1.937.- Reunidos en Consejo de Guerra para ver y fallar el procedimiento sumarísimo de urgencia nº 53 incoado por Rebelión Militar contra los procedados ALFONSO GARCIA BORREGUERO, FRANCISCO PEREZ ANDRES, SEGUNDO SAN MARTIN SANZ, JUAN CONDE HERNANDO, JULIAN GUIMON REZOLA, ANASTASIO GONZALEZ PALACIOS, JUSTO BADILLO CUEVAS, ELIAS ADELL GARGALLO, PILAR RUIZ MARIN, MARIA CENICEROS DUFOS, MARIA LUISA GOICOECHEA GUEZURAGA, PILAR URRUTIA ALVAREZ y ELIAS BERDOTE LOPEZ, todos mayores de 18 años. Vistas las actuaciones y oídos los informes del Fiscal y Defensor y las manifestaciones de los procesados, declaramos;

RESULTANDO probado que al procesado **ALFONSO** GARCIA BORREGUERO, de profesión médico, se le ofreció y actuó como delegado rojo del Ejército del Norte, visitó los frentes de Asturias, Santander y Vizcaya y en Gijón intervino como Director de un Hospital, actuando con el grado de Capitán, cobrando dicho sueldo más ciento cincuenta pesetas de plus por la voluntariedad del servicio. Que el procesado FRANCISCO PEREZ ANDRES, también médico, ha estado afiliado a la U.G.T. y prohibió a un compañero hablara de las victorias del ejército nacional.

JULIAN GUIMON REZOLA, se le nombró y actuó de Sub-Director del Hospital de Bilbao, promovió la creación de la Universidad Vasca y el nombramiento de enfermeras EMAKUMES, aunque son muchas las personas que abonan a su favor.

JUAN CONDE HERNANDO, barbero del Hospital, afiliado a la



Document downloaded from <http://www.elsevier.es>, day 10/02/2026. This copy is for personal use. Any transmission of this document by any media or format is strictly prohibited.

2

C.N.T., el que amenazó a muerte a varios por cuestiones sociales y además anunció el asalto de las Religiosas del Hospital.

ANASTASIO GONZALEZ PALACIOS, mozo del Laboratorio, ha actuado desde 1.931 de Presidente de la Agrupación de enfermeros afectos a la U.G.T., tenía hecha una lista negra de las personas de orden y siempre que había algún mitin de izquierdas ponía la radio a todo volumen.

JUSTO BADILLO CUEVAS, enfermero de la U.G.T., que no prestó el debido auxilio al Sr. Basáñez cuando llegó herido, perteneciendo al batallón disciplinario.

ELIAS ADELL GARGALLO, practicante de la U.G.T., que ha consentido que su nombre figure en la Directiva de dicha Sindical.

PILAR RUIZ MARIN, enfermera de la U.G.T., que tenía señaladas a las personas de orden y atendía sólo a los médicos izquierdistas.

MARIA CENICEROS DUFOS, enfermera afiliada al partido nacionalista, a quien se le atribuye la frase de "HAY QUE ACABAR CON LA QUINTA COLUMNA".

MARIA LUISA GOICOECHEA GUEZURAGA, nacionalista desde 1.931 y enfermera voluntaria desde los primeros momentos del Movimiento, y PILAR URRUTIA ALVAREZ, enfermera del Hospital, también nacionalista y durante el movimiento ha hecho reiteradamente manifestaciones en contra del Movimiento Nacional.

RESULTANDO que al procesado ELIAS BERDOTE LOPEZ, de la U.G.T. desde 1.930, se le ha encontrado llamando "Camarada y de V. y de la Causa Socialista", si bien durante el dominio rojo ha protegido a personas de orden y que al procesado SEGUNDO SAN MARTIN SANZ, practicante, afiliado a la U.G.T. se le ha visto constantemente en la calle con un emblema con la Hoz y el Martillo.-

CONSIDERANDO que los hechos referidos en el primer RESUL-



TANDO son constitutivos del delito de REBELION MILITAR previsto y sancionado en los artículos 237 y nº 2º del 238 del Código de Justicia Militar, siendo autores responsables los procesados ALFONSO GARCIA BORREGUERO, JUAN CONDE HERNANDO, ANASTASIO GONZALEZ PALACIOS, en quienes concurre la agravante de PERVERSIDAD, y JUSTO BADILLO CUEVAS, ELIAS ADELL GARGALLO, FRANCISCO PEREZ ANDRES, JULIAN GUIMON REZOLA, PILAR RUIZ MARTIN, MARIA CENICEROS DUFOS, MARIA PILAR GOICOECHEA GUEZURAGA, PILAR URRUTIA ALVAREZ, sin circunstancias modificativas.

CONSIDERANDO que los hechos referidos en el segundo RESULTANDO son constitutivos del delito de AUXILIO A LA REBELION MILITAR previsto y castigado en el párrafo 1º del artículo 240 del Código de Justicia Militar, siendo autores responsables los procesados SEGUNDO SAN MARTIN SANZ y ELIAS BERDOTE LOPEZ, en quienes no concurren circunstancias modificativas.

Vistos los artículos invocados y demás de aplicación del Código de Justicia Militar y penal ordinario,--

FALLAMOS que debemos condenar y condenamos a los procesados ALFONSO GARCIA BORREGUERO, JUAN CONDE HERNANDO y ANASTASIO GONZALEZ PALACIOS a la pena de muerte en concepto de autores responsables del delito de REBELION MILITAR que fue calificado en el primer CONSIDERANDO con la agravante de PERVERSIDAD; también condenados a los procesados JUSTO BADILLO CUEVAS, ELIAS ADELL GARGALLO, FRANCISCO PEREZ ANDRES, JULIAN GUIMON REZOLA, PILAR RUIZ MARTIN, MARIA CENICEROS DUFOS, MARIA LUISA GOICOECHEA GUEZURAGA y PILAR URRUTIA ALVAREZ a la pena de reclusión perpetua con los accesorios de inhabilitación ABSOLUTA durante la condena, como autores del mismo delito que los anteriores sin circunstancias modificativas y por último a los procesados SEGUNDO SAN MARTIN SANZ y ELIAS BERDOTE LOPEZ a cada uno a la pena de doce años y



un día de reclusión temporal e inhabilitación ABSOLUTA durante la condena como autores del delito de Auxilio a la Rebelión Militar sin circunstancias. También a todos los que van citados les declaramos responsables civilmente y la regulación se hará en el período de ejecución de esta sentencia. A los condenados a privación de libertad les será de abono el tiempo de prisión preventiva sufrida.- Así por esta nuestra sentencia lo pronunciamos y firmamos. SANTOS FERNANDEZ URIEL.- LUCIANO FERNANDEZ.- JOSE GIL.- ADOLFO MARTINEZ.- JOSE MARIA MARMOL.

Cuya sentencia fue aprobada y declarada firme por Decreto del Ilmo. Sr. Auditor, fecha 12 de julio.-

Igualmente certifico que en dicho sumario aparece un oficio de la Secretaría General de S.N. del Jefe del Estado conmutando la pena impuesta a ALFONSO GARCIA BORRERO por la inferior en grado.



LA PARTE DE LA SENTENCIA CORRESPONDIENTE A

JULIAN GUIMON REZOLA

Don Valeriano Peña González, Secretario Habilitado del  
Juzgado Militar número 1.-

CERTIFICO: Que en procedimiento sumarísimo de urgencia  
número 53 se dictó la resolución del tenor literal siguiente:

SENTENCIA.- En la Ciudad de Bilbao, a 30 de Junio de  
1.937.- Reunidos en Consejo de Guerra para ver y fallar el proce-  
dimiento sumarísimo de urgencia número 53 incoado por rebelión  
Militar contra los procesados .....  
JULIAN GUIMON REZOLA .....

Vistas las actuaciones y oídos los informes del Fiscal  
y Defensor y las manifestaciones de los procesados, declaramos:

RESULTANDO probado que .....  
JULIAN GUIMON REZOLA. Se le nombró y actuó de Sub-Director del  
Hospital de Bilbao, promovió la creación de la Universidad Vasca  
y el nombramiento de enfermeras EMAKUMES, aunque son muchas las  
personas que abonan a su favor .....

CONSIDERANDO que los hechos referidos son constituti-  
vos del delito de REBELION MILITAR previsto y sancionado en los  
artículos números 237 y número 2º del 238 del Código de Justicia  
Militar, siendo autores responsables los procesados .....  
JULIAN GUIMON REZOLA .....

Vistos los artículos invocados y demás de aplicación  
del Código de Justicia Militar y Penal ordinario.

FALLAMOS que debemos condenar y condenamos a los pro-  
cesados .....

JULIAN GUIMON REZOLA .....



Document downloaded from http://www.elsevier.es, day 10/02/2026. This copy is for personal use. Any transmission of this document by any media or format is strictly prohibited.

a la pena de reclusión perpetua con los accesorios de inhabilitación ABSOLUTA durante la condena .....

También a todos los que van citados les declaramos responsables civilmente y la regulación se hará en el período de ejecución de esta sentencia. A los condenados a privación de libertad les será de abono el tiempo de prisión preventiva sufrida.

Así por esta nuestra sentencia lo pronunciamos y firmamos. SANTOS FERNANDEZ URIEL.- LUCIANO FERNANDEZ.- JOSE GIL.- ADOLFO MARTINEZ.- JOSE MARIA MARMOL.

Cuya sentencia fue aprobada y declarada firme por Decreto del Ilmo. Sr. Auditor, fecha 12 de Julio.



TESTIMONIOS

El que suscribe, Cesáreo Díaz Emparanza, médico, colegiado nº 60, con ejercicio en Bilbao, de 58 años de edad, domiciliado en Gran Vía, 38, principal, presta la siguiente declaración jurada.

Que el día 8 de enero de 1.937 recibí un oficio, firmado por el Presidente de la Junta del Santo Hospital Civil de Bilbao, que textualmente dice así. "En orden a la provisión de la plaza de Director del Santo Hospital Civil, vacante por enfermedad del Dr. Arrese, La Junta ha adoptado el acuerdo de encomendar interinamente la Dirección al Jefe de Clínica más antiguo D. Cesáreo Díaz Emparanza, asistido por un Jefe de Cirugía libremente elegido por él, y por el Sr. Administrador, quedando éste encargado especialmente de todo lo concerniente al abastecimiento de víveres, compra de toda clase de artículos y suministros, y entendiéndose, que en la esfera facultativa, el primero, y en lo administrativo el segundo, la actuación de ambos delegados tendrá la misma virtualidad que si fuera el propio Director quien ejerciera directamente sus funciones, en tanto no recabe para sí las atribuciones que les confíe, dejando pendiente la Junta para una de sus próximas reuniones la fijación de los emolumentos que han de recompensar dichos servicios."

En virtud de este oficio, consulté con los Jefes de Cirugía D. Abilio Saldaña, D. Eusebio García Alonso y D. Francisco Pérez Andrés acerca del Jefe de Cirugía a elegir para colaborar conmigo conforme el acuerdo de la Junta y siendo unánime el criterio de dichos Sres. con el mío, propuse a D. Julián Guilmón, Jefe de Cirugía por oposición, para que aceptara dicho cargo.



El Sr. Guimón me expuso reparos fundados en su labor como cirujano y ante mis llamamientos al cariño que nos al tradicional Centro Benéfico de Bilbao y su Provincia, después de tomarse 24 horas para meditar sobre su respuesta, aceptó el cargo.

Puedo asegurar que ni en el espíritu de mis compañeros ni en el mío intervino para nada idea política alguna en la proposición de cargo de Sub-Director al Sr. Guimón, de quien tenía entonces, ni tuve después, información alguna de que hubiera en política en todo el curso de la guerra.

Hay que hacer constar que en otros varios períodos ha existido Sub-Director en el Hospital.

El Sr. Guimón manifestó en la primera reunión de la Junta a que asistimos que no aceptaba ninguna autonomía en el puesto y, en efecto, en todo el período que duró mi Dirección, fuimos de completo acuerdo, consultándome el Sr. Guimón todos los asuntos, contando por nuestra parte para cualquier decisión importante con la Junta y también con los Jefes de clínica, con los cuales se celebraron diversas reuniones en las que hubo siempre perfecto acuerdo.

Para los servicios del Hospital se hicieron dos distintos grupos de nombramientos de enfermeras. Un grupo fue nombrado por exclusiva cuenta de Sanidad Militar del llamado Gobierno Vasco: la selección de estas enfermeras fue hecha por dicho departamento de Sanidad, que abonaba sus sueldos y del cual dependían. Otro grupo fue nombrado por iniciativa del Hospital con intervención nuestra, por concurso anunciado en la prensa local, sin que se exigiera condición política alguna para solicitar el puesto; el concurso fue juzgado por los Jefes de Cirugía constituidos en Tribu-



nal, que dictaminaron con absoluta unanimidad. Para las dieciocho plazas de este concurso, se presentaron veinte solicitudes, eliminándose a dos: una por falta de título y otra por falta de la edad exigida. El acta del Tribunal fue aprobada unánimemente por la Junta del Hospital, formada por personas de distintas ideologías. He de manifestar también que la actuación de D. Julián Guimón fue de gran interés por nuestro Hospital y su conducta en la Sub-Dirección imparcial y apolítica.

---

Don Abilio Saldaña Larrainzar, Doctor en Medicina y Cirugía, Capitán Médico asimilado, Jefe de Equipo Quirúrgico, Cirujano Jefe del Hospital Civil de Bilbao y Presidente del Colegio Oficial de Médicos de Vizcaya, presta la siguiente declaración jurada:

Conozco a Don Julián Guimón Rezola, por haber sido compañero suyo como cirujano del Hospital Civil de Bilbao. Tenía noticia de que este señor había estado afiliado al Partido Nacionalista Vasco, del que se dió de baja en Enero de 1.936 por discrepancias con el rumbo que tal partido tomaba.

Durante la guerra sólo he observado en el Sr. Guimón actuación facultativa, atendiendo a todos los pacientes, sin distinción de ideologías.

Por haberse reunido todos los heridos varones procedentes de las matanzas de las cárceles de Bilbao del día 4 de Enero de 1.937 en una sala a mi cargo, puedo testimoniar que varios de ellos pasaron voluntariamente a ser atendidos en la clínica par-



titular del Sr. Guimón, como algún otro a otra Clínica, permaneciendo protegidos hasta la liberación de Bilbao por nuestro Glorioso Ejército.

D. Cesáreo Díaz Emparanza, al ser nombrado de nuevo Director del Hospital, por dimisión del Sr. Arrese, me manifestó que la Junta del Hospital deseaba, ya que en aquel entonces el trabajo quirúrgico tenía gran preponderancia por la guerra, que la Dirección tuviera a uno de los Jefes de Cirugía del Hospital a modo de adjunto o asesor; y solicitaba mi opinión acerca del nombramiento del Sr. Guimón en quien había pensado para este menester. Yo manifesté hallarme completamente conforme con su designación.

El Sr. Guimón no hizo nombramiento alguno de enfermeras. El Hospital anunció un concurso para 18 plazas, sin exigir condición política alguna, sino facultativas y de edad. Este concurso fue juzgado por los Jefes de Cirugía del Hospital, que elevaron a la Junta su propuesta, haciendo ésta los nombramientos.

Para que conste donde convenga, firmo esta declaración en Bilbao el día 10 de Junio de 1.939. Año de la Victoria.

---

El suscrito, JUAN ANTONIO HERRAN DE LAS POZAS, Abogado y vecino de Bilbao, domiciliado en Ercilla, 14, 2<sup>o</sup>, derecha, libremente y bajo juramento, declara:

PRIMERO, Que ha pertenecido durante varios años a la Junta del Santo Hospital Civil de Bilbao, habiendo desempeñado la Presidencia desde el mes de Julio de 1.935 al de Febrero de 1.936, y con carácter interino, últimamente, el cargo de Secretario, por ausencia del efectivo.



SEGUNDO. Que por dimisión presentada por el Director, D. Jesús Arrese, acordó la Junta nombrar Director del Santo Hospital Civil al Jefe de Medicina D. Cesáreo Díaz Emparanza, facultándole para designar libremente como colaborador suyo en la Dirección a uno cualquiera de los cuatro Jefes de Cirugía, siendo elegido por el Sr. Díaz Emparanza, de acuerdo con los restantes Jefes de Cirugía, D. Julián Guimón.

TERCERO. Que en la primera reunión de la Junta a que asistieron los Doctores Díaz y Guimón, este segundo manifestó que no deseaba autonomía alguna para su cargo y que se proponía actuar en todo momento bajo las indicaciones del Director, habiendo observado el suscrito una completa compenetración entre el Director y su adjunto, D. Julián Guimón, y de ambos con la Junta, a pesar de las diversas ideologías de sus componentes.

CUARTO. Que en la actuación del Sr. Guimón no advirtió maniobras ni partidismos de tipo político.

QUINTO. Que durante la Dirección del Sr. Díaz Emparanza el Santo Hospital Civil nombró para su servicio un grupo de enfermeras por concurso, sin que se exigiera filiación política determinada, siendo juzgado el concurso por un tribunal compuesto por los Jefes de Medicina y Cirugía, y aprobándose la propuesta a la Junta por unanimidad.

SEXTO. Que la Junta en repetidas ocasiones, felicitó a los Sres. Díaz Emparanza y Guimón por su interés, desvelos y actuación afortunada en la dirección del Establecimiento.

Y para que se exhiba esta declaración donde convenga, y con el ofrecimiento de ratificarla, si fuere preciso, la extiende y firmo en Bilbao a 14 de Septiembre de 1.937.- II año Triunfal.



Los que suscriben D. Eusebio García Alonso, vecino de Bilbao, domiciliado en Licenciado Poza nº 29 y D. Cesáreo Díaz Emparanza, domiciliado en Gran Vía 38, médicos colegiados en el de Vizcaya, hacen la siguiente declaración:

Que D. Julián Guimón perteneció a la Comisión de la Facultad de Medicina durante el llamado Gobierno Vasco y que en su actuación observó una conducta moderada de extremismos, se opuso a que el vascuense fuera declarado como de enseñanza obligatoria de la Facultad de Medicina, logrando que prosperara su propuesta en votación, quedando como de carácter voluntario su estudio.

Propuso en la Comisión que se realizaran gestiones para la liberación de los médicos presos, las que se hicieron repetidas veces.

Bilbao 15 de septiembre de 1.937



DON FERNANDO MARTI ALVARO, TENIENTE CORONEL PRIMER  
JEFE DE LA COMANDANCIA DE LA GUARDIA CIVIL DE VIZCAYA Y DELE-  
GADO DE SEGURIDAD INTERIOR Y ORDEN PUBLICO DE LA MISMA PROVIN-  
CIA

CERTIFICO: Que de los antecedentes que obran  
en esta dependencia resulta, que Don Julián Guimón  
Rezola, perteneciente antes del Glorioso Movimien-  
to Nacional y como antiguo afiliado a Acción Vasca,  
de cuyo partido se dió de baja en Enero de 1.936  
por no estar conforme con la orientación que enton-  
ces tomaba este partido.

Durante el dominio rojo-separatista y en el  
orden político se hallaba separado de los parti-  
dos y por tanto no sólo no actuó sino que careció  
de significación, y en cuanto a su nombramiento de  
Sub-Director del Hospital Civil fue a propuesta de  
la Dirección y de conformidad con los demás médi-  
cos Jefes de Clínica.

Y, para que conste y a petición de parte intere-  
sada expido el presente en Bilbao a 28 de Marzo de  
1.938. II Año Triunfal.



El que suscribe, Indalecio Gorrochategui, Ingeniero de Minas, de 38 años, con domicilio en Colón de Larreátegui, 43, declaro:

Que Don Julián Guimón y Rezola, médico, domiciliado en Bilbao, se dió de baja en Acción Vasca el mes de Enero de 1.936.

Hago esta declaración con pleno conocimiento de causa, toda vez que yo mismo presenté la redacción de la baja, y es de dominio público en Bilbao tal actitud del Sr. Guimón, como podrán atestiguar numerosas personalidades de la máxima garantía.

Declaro también, que las manifestaciones de carácter político llegadas a mi conocimiento por las conversaciones sostenidas con el Sr. Guimón, estaban, en absoluto, reñidas con la trayectoria de Acción Vasca, lo que a mi juicio, motivó la baja de la que doy fe.

Bilbao, 23 de Julio de 1.937.



El que suscribe, Santiago Crespo Alday, adjunto a la mesa electoral del Distrito de la Diputación, Colegio-Escuela Indauchu, nombrado por la Junta del Censo para dicho cargo de Adjunto en las elecciones de Febrero de 1.936;

Declara; Que Don Julián Guimón no emitió voto en las elecciones a diputados a Cortes de Febrero de 1.936.

Lo que hago constar en honor a la verdad y a la justicia, en Bilbao a 21 de Julio de 1.937.- Segundo Año Triunfal.-  
¡Viva España! ¡Arriba España! ¡Saludo a Franco!

---

El que suscribe, Jesús Barreiro, adjunto en la mesa electoral del Distrito de la Diputación, colegio Escuela de Indauchu, en las elecciones de Febrero de 1.936, declara que tiene la impresión sincera de que Don Julián Guimón no votó en aquel día y en aquella mesa.

Bilbao, 23 de Julio de 1.937

Segundo Año Triunfal.- ¡Viva España! ¡Viva Franco! ¡Arriba España!

---



D. Fernando Sáinz de Incháustegui, Marqués del Real Socorro, de 52 años de edad, vecino de Güecho (Vizcaya) espontáneamente declaro:

Que el día 21 de Julio de 1.936 abandoné el domicilio en que vivía con mi esposa y mi hijo Fernando, en unión de éste; para evitar la persecución de que fuimos objeto por nuestra significación y nuestras ideas, viéndonos desde entonces obligados a cambiar cinco veces nuestro escondite hasta que fuimos descubiertos y detenidos por D. Luis Ortúzar, Jefe de Orden Público en Bilbao, el día 25 de septiembre, viéndonos estúpidamente acusados de haber hecho señales, desde el sitio donde nos encontrábamos, a la aviación que aquel día bombardeó Bilbao.

Siendo dedicada mi salud y hallándome extenuado por las persecuciones sufridas y las privaciones y molestias de la prisión, gestioné mi traslado a una clínica, dirigiéndome a la del Dr. D. Julián Guimón, quien en el mes de Enero nos recibió a mi hijo y a mí con toda solicitud y afecto, tratándome con lavados y régimen adecuado una úlcera de estómago que me aquejaba, y cuando por la mejoría de esta dolencia se hizo preciso alegar otra que justificase mi permanencia en la clínica, fui al efecto deliberadamente operado por el Sr. Guimón en una mano en la que nada tenía, prolongándose así mi estancia en la clínica que significaba mi seguridad personal, pues mediante palabra

(1) de honor que los acogidos en esas circunstancias, que fuimos var-

(1) Lo subrayado no es cierto. Tenía unos quistes pequeños. Por la operación podían haberse trasladado de la Clínica a la Cárcel.



rios, dímos al Dr. Guimón de no evadirnos, éste logró que se suprimiera la guardia roja en su clínica, haciéndose, con evidente riesgo, responsable de que seguiríamos en ella hospitalizados mientras lo exigiera nuestro estado de salud.

En estas circunstancias y unos quince días antes de la entrada en Bilbao del Ejército Nacional, viendo que no obstante lo ocurrido anteriormente se había montado guardia roja en la clínica y ante la amenaza que conocimos de que íbamos a ser trasladados los presos a Santander, recabé del Sr. Guimón que me relevara de la palabra empeñada, y no sólo lo hizo sino que a mi instancia se prestó a ayudarme para mi fuga y merced a haber dejado abiertas a propósito varias puertas de la clínica, pude evadirme como lo hicieron también los otros detenidos D. Juan José Abaitua y D. Ramón Prieto, herido en la cárcel, el lunes 14 de Junio, escondiéndome primeramente en un refugio que me preparó el P. Ancín y después en otros.

Esta fuga motivó la detención de dos de las Hermanas que ejercían su ministerio en la clínica y serios disgustos al Sr. Guimón, que difícilmente pudo soslayarlos, al propio tiempo que procuró no salir de Bilbao hasta que fue ocupado el sábado 19 del mismo mes de Junio, según es sabido.

He de hacer constar, que esta solicitud y esos favores del Sr. Guimón, fueron en absoluto desinteresados, pues tanto por mi estancia como por la de mi hijo, percibió estrictamente el importe de la pensión, moderadísimo en relación con el trato recibido y el coste y dificultad de obtención de los alimentos, sin que percibiese cosa alguna por sus intervenciones como médico en nuestra asistencia.

Por último he de añadir que en mis conversaciones con el Dr. Guimón, le oí decir que aunque había pertenecido al parti-



do de Acción Nacionalista Vasca por afecto a la región, se hallaba dado de baja y apartado de toda actuación política desde el mes de Enero de 1.936, por disentir de la orientación ~~comunista~~ *comunista (1)* en que veía orientado a aquel partido.

Y para que conste en servicio de la verdad, suscribo por duplicado esta declaración coincidente en lo substancial con otra que firmé en el mes de Junio y que me dicen no pudo ser utilizada en el juicio sumarísimo seguido al Sr. Guimón.

Bilbao 10 de Septiembre de 1.937. II año Triunfal.

SALUDO A FRANCO

ARRIBA ESPAÑA

---

D. Fernando Sáinz de Inchaustegui e Yrala, vecino de Gñebhe (Vizcaya), espontáneamente declaro:

Que el día 21 de Julio de 1.936, abandoné mi domicilio en unión de mi padre el Marqués del Real Socorro, sabiendo que íbamos a ser buscados y perseguidos por los rojos y separatistas, por nuestra significación social y política, como efectivamente lo fuimos, de tal modo que para evitar la detención cambiamos de refugio cinco veces desde esa fecha hasta el día 25 de Septiembre, día del primer bombardeo de Bilbao por la Gloriosa Aviación Nacional, en que fuimos descubiertos y detenidos por el Sr. Ortúzar, Jefe de Orden Público en el llamado Gobierno de Euzkadi, viéndonos inculcados absurdamente de haber hecho señales a aquélla desde la buardilla en que nos encontrábamos escondidos.

Extenuados y enfermos, conseguimos ser trasladados a la clínica del Dr. S. Sebastián, donde no pudimos permanecer mu-

(1) Rectificación mía. Decía "antifascista y antipañola", lo que no es cierto.



cho tiempo, debido a haberse hecho público que en dicha clínica existía un nido de fascistas y temer un asalto el día menos pensado, gestionamos nuestro traslado a otra clínica, tropezando entre otras dificultades con la de que en ninguna se nos daba facilidades de admisión, logrando que ésta ocurriera al iniciar nuestras gestiones cerca de la clínica del Dr. D. Julián Guimón, que se prestó a recibirnos y nos atendió desde el primer momento con toda solicitud y afecto.

Estando en dicha clínica se intentó sacarme de ella varias veces para llevarme al batallón disciplinario por estar en edad militar y ante la reiteración de esta amenaza, cuya realización fue evitada varias veces por el Dr. Guimón, expuse a éste mi propósito de causarme alguna lesión que impidiera la realización de aquel deseo de los rojos-separatistas, hallando en él mi propuesta la mejor acogida, aunque me expuse que en su clínica se carecía de medios técnicos para producirme voluntariamente la fractura de un brazo como yo había decidido hacer. En vista de ello y aprovechando una ausencia deliberada y convenida del Dr. Guimón de la clínica, simulé una caída y la fractura y el dolor consiguientes siendo trasladado a la clínica especializada en lesiones de esa índole del Dr. Salaverri, donde técnicamente se me provocó la fractura deseada para esquivar mi servicio en las filas rojas, cosa que logré porque lo dilatado de mi curación dió tiempo a que permaneciera en la nueva clínica hasta la liberación de Bilbao por el invicto Ejército Nacional.

Y pareciéndome deber hacer en conciencia esta declaración que se ajusta a la verdad a ruego de la esposa del Dr. Guimón, la suscribo por duplicado coincidente en lo esencial con otra análoga que firmé en el mes de Junio último que me dicen no pudo ser

(1) La verdad es que yo me negué discretamente a practicarle ninguna lesión y le dije que hiciera una proposición a Salaverri.



utilizada en el proceso seguido al Sr. Guimón.

Bilbao, 10 de septiembre. II año Triunfal.

SALUDO A FRANCO

VIVA ESPAÑA

ARRIBA ESPAÑA

El que suscribe MANUEL DE SANTIAGO G. MARIN, afiliado a F.E.T. y de las JONS, libre y espontáneamente y bajo juramento declare:

Que fui herido el día 4 de Enero en los fusilamientos ocurridos en la prisión de los Angeles Custedios, y de allí fui trasladado al Hospital de donde salí el día 9 del mismo mes para la Clínica del Dr. Guimón, donde fui admitido sin ninguna traba, a pesar de no conocer a dicho Dr. y fui tratado con toda clase de consideraciones durante mi estancia en ella que duró hasta el 18 de Junio del presente año.

Que el Dr. Guimón, ofreciéndose en garantía, consiguió con los consiguientes riesgos y recabando de nosotros simples promesas de que no se intentarían evasiones, que en la Clínica de su propiedad, donde junto con el declarante había otros detenidos y amenazados de muerte, no hubiese ninguna clase de guardia, lo que, aunque parezca paradójico, hacía que la seguridad de los refugiados allí fuese mayor y evitaba el trato con los guardias, que en su mayor parte (lo sé por mi estancia en otras prisiones) eran asesinos al servicio del llamado Gobierno de Euzkadi.

Al no existir la guardia, el Dr. Guimón nos dijo que podíamos tener toda clase de entrevistas con nuestros familiares y amigos, tanto es así, que por mi gravedad estuve asisti-

(1). Los que hacían guardia en la Clínica era viejos Agentes de



do día y noche por familiares, lo que no se hubiese consentido de existir esa guardia.

Hacia el 24 o 26 de Enero y como consecuencia recibida al ser fusilado, tuve una noche una gran hemorragia, el Dr. Guimón me aplicó inmediatamente todos los remedios; pero no obstante mi situación fue haciéndose cada vez más crítica, llegando un momento en que la única salvación era una inmediata transfusión de sangre, lo que hizo el Dr. Guimón cediéndome la suya, logrando así que saliera adelante del peligro. Es de tener esto en cuenta porque no hay que olvidar la persecución que se hacían objeto los que por cualquier concepto favorecían a los presos.

También he de añadir, que con ocasión de tener que dar a luz mi mujer, el Dr. Guimón le cedió un cuarto en su Clínica contra lo acostumbrado en ella para que estuviese próxima a mí y evitarnos a ambos mayores torturas morales que las que ya teníamos sobre nosotros.

Posteriormente y viendo cómo se deslizaban los acontecimientos, que hacían creciese nuestro temor de detenidos y amenazados a la barbarie roja, a medida que se aproximaban las tropas anacionales, se proyectó un plan de fuga de la Clínica, de acuerdo con el asentimiento y consejo del Dr. Guimón, con lo cual se trataba lograr que los últimos instantes de la desbandada roja no nos cogieran en la Clínica, pues los rojos sabían que en las clínicas había detenidos y era de presumir que fueran a asesinarlos o a arrastrarlos con ellos en la huida. Este plan falló por haber colocado el Gobierno de Euzkadi guardia en la Clínica en los últimos días, pero fue modificado y llevado a cabo por tres de los detenidos que gracias al Dr. Guimón pudieron marcharse quedando yo en la Clínica por no poderlo hacer a



causa de mi inutilidad física; pero no por eso quedé abandonado por el Dr., ya que el viernes anterior a la entrada de las tropas se presentó a las dos de la tarde en la Clínica con objeto de trasladarme al Hospital donde era de presumir que fuese mayor la seguridad personal. Este traslado no se realizó por haber logrado yo media hora antes salir de la Clínica por otro conducto.

Aparte de esto, he de decir que en la Clínica he sido tratado por el Dr. Guimón con todo afecto, habiéndome favorecido en todo lo que ha podido, siendo esto más de tener en cuenta por el hecho de que YO NO CONOCIA DE NADA AL DR. GUIMON y sólo fui admitido en su clínica porque el Dr. quería por todos los medios favorecer a los presos y perseguidos; no teniendo que achacar por ello su trato a servicios personales que él me debiese ni a favoritismo ni a ningún otro género de interés.

Como resumen de lo expuesto anteriormente he de añadir que el comportamiento del Dr. Guimón durante la guerra ha sido de ayuda completa y desinteresada a los detenidos y perseguidos y, en fin, a todas cuantas personas de derechas se le acercaron y pidieron amparo.

Y para que conste donde y como proceda extiendo por duplicado la presente declaración que reproduce en lo esencial otra que suscribí en el mes de Junio último.

En Bilbao a 3 de Septiembre de 1.937.- II año Triunfal.

VIVA FRANCO

VIVA ESPAÑA

ARRIBA ESPAÑA



D. FEDERICO URCAREGUI OCHANDIANO, Presbítero, Coadjutor de la Parroquia de Sestao, Vizcaya, invocando el nombre de Dios declare:

Que el día 23 de Julio de 1.936, a las siete de la mañana, en la Sacristía de Sestao fui herido gravísimamente por arma de fuego después de ser obligado a colocarme cara a la pared y los brazos en cruz por tres foragidos.

Que conducido inmediatamente al Santo Hospital Civil de Bilbao fui atendido con exquisita solicitud por D. Julián Guimón permaneciendo en aquel benéfico establecimiento hasta fines de Septiembre del mismo año.

Que en esa fecha D. Julián Guimón por espontáneo y generoso impulso me trasladó a su clínica porque, dada la gravedad de mi estado, deseaba atenderme él personalmente.

Esta resolución de dicho Sr. obedeció al hecho de no estimar segura mi situación en el Hospital dado mi carácter sacerdotal, ya que ocupaba la sala, donde, aunque en habitación aparte, era yo atendido a la vez que los heridos de guerra y era de temer cualquier peligro para mí por los muchos milicianos reo-separatistas que la invadían continuamente.

Que este acto de D. Julián Guimón es tanto más meritorio cuanto mi estancia en su clínica hasta el día 26 de Junio del presente año ha sido completamente gratuita, siendo así que yo no conocía a D. Julián de nombre ni de vista hasta el día en que mi desgracia me puso en sus manos.

Que hago esta declaración en honor de la verdad y movido de un sentimiento de inmensa gratitud hacia el bienhechor que la bondad de Dios me deparó en aquellas terribles circunstancias de mi vida.



Consigno la declaración que hago en este documento por duplicado, reflejando lo sustancial otra análoga que suscribí en el mes de Junio último.

Sestao (Vizcaya) 9 de Septiembre de 1.937.- II año Triunfal.

VIVA FRANCO

VIVA ESPAÑA

(ES COPIA)

---

Daniel Gárate Zárraga, mayor de edad y vecino de esta Villa en el Barrio de La Peña, a V.E. con el mayor respeto expone:

Que el día 22 de Julio de 1.936, y en los sucesos que se titularon de la Gran Vía, recibí un tiro y fui trasladado al Hospital Civil sobre las siete de la tarde.

Que nada más llegar fui atendido y curado solícitamente por D. Julián Guimón, quien me extrajo lasostas y me trató con todo cariño.

Me hospitalizaron en vista de mi estado y al lado de mi cama había uno de Sestao y comenzó a insultarme porque era fascista o falangista. Al decirle al Sr. Guimón lo que me pasaba, éste me trasladó de sala y me llevó a una habitación completamente independiente.

Poco después y como los milicianos intentasen sacar a todos los de derechas (pues estábamos algunos heridos) el mismo Sr. Guimón en compañía del Sr. Fano, me trasladó a otra habitación más alejada, procurando esconderme para así evitar cualquier agresión personal.

Que la herida cerró en falso y hubo necesidad de operarme de nuevo para extraerme otra posta y solícitamente acudió el mencionado Sr. Guimón y me operó.



Que poco después fui insultado de nuevo por unos milicianos, y al tratar de esto con el Sr. Guimón, éste le manifestó que no se apurase y que si otra vez insistían, que le llevaría a su clínica particular. El exponente le manifestó la imposibilidad de poder abonar la pensión y gastos de la clínica, pues es un obrero que no tiene más que el sueldo diario y en aquella ocasión ni eso, pues llevaba bastante tiempo de paro forzoso, contestando el Sr. Guimón: "que no me apurase que eso era lo de menos, que lo que hacía falta es que salvase la vida y que me pusiese bien".

Creo, Señor, que todo esto y que no siguiesen molestándome se lo debo al Sr. Guimón, pues aun cuando me trasladaron luego al Carmelo, el Sr. Guimón nunca me dió el alta.

Que el día 4 de Enero, fui de nuevo herido en los sucesos de los Angeles Custodios (y trasladado al Hospital) fui curado en la Casa de Socorro y trasladado al Hospital, me vió el Sr. Guimón y aunque no era el encargado de curarme, me hizo la cura y me atendió muy solícitamente y con el mismo cariño de siempre.

Creo Señor que le debo la vida y por lo mismo, y en prueba de agradecimiento, he creído conveniente hacer esta manifestación espontánea, pidiendo clemencia para Don Julián Guimón, quien se ha portado con el exponente con el mismo cariño que de sí sus familiares se tratara.

VIVA ESPAÑA

VIVA FRANCO

ARRIBA ESPAÑA.

Bilbao, Segundo Año Triunfal, día 28 de Julio de 1937.-  
Daniel Gárate.- Firmado.- Hay un sello en tinta que dice "Sindicatos Nacionales de la Producción de F.E.T. y de las J.O.N.S.- Secretaría Provincial de Vizcaya.-

Es copia



Don Rodrigo Alvarez Pascual, natural de Sestao, Provincia de Vizcaya, de 34 años de edad, estado casado, empleado como chofer en la Sociedad Española CONSTRUCCION NAVAL DE SESTAO, y domiciliado en Baracaldo, Portu, 8-1º-deracha, libre y espontáneamente declaro:

1.- Que con fecha 23 de Octubre de 1.936 fui detenido en la Factoría de la Naval por los rojos-separatistas, y encarcelado en los calabozos de Urbinaga de Sestao.

2.- Que en la madrugada del 26 de Octubre penetraron unos enmascarados en los calabozos de retención pretendiendo asesinarme, habiéndome inferido dos heridas por disparo de pistola, una en la cara y otra en el brazo izquierdo y como consecuencia de las cuales fui trasladado al Santo Hospital Civil de Bilbao, ingresando en la Sala Iturrizar regentada por Don Julián Guimón.

3.- Que siendo imposible mi permanencia en dicha sala por los continuos insuños y amenazas de los milicianos heridos rojos-separatistas a pesar de las medidas tomadas por el Dr. Guimón, me propuso este Sr. la conveniencia de trasladarme a su clínica, a lo que yo aduje mi falta de recursos, a lo que objeté que respecto a esa cuestión no teníamos que hablar y que no me apurase; ingresando en su clínica el día 4 de Noviembre de 1936.

4.- Que en el tiempo que he permanecido en la Clínica he tenido ocasión muchas veces de comprobar su desmedido interés por los presos hospitalizados en su clínica, llegando en una ocasión a ofrecer su sangre para una transfusión, operación que se realizó felizmente salvando la vida a un pobre desgraciado víctima de los odios marxistas.

5.- Que el día 15 de Junio y después de la evasión de tres detenidos en la clínica tuve que huir y acogerme al am-



paro del Sr. Guimón, quien me llevó al Hospital Civil, donde nos oculté hasta la llegada del glorioso ejército libertador de Bilbao.

Y respondiendo lo dicho a la verdad firmo este documento por duplicado reiterando una declaración análoga que hice en el mes de Junio último.

Bilbao a 9 de Septiembre de 1.937.- II año Triunfal.

VIVA FRANCO      ARRIBA ESPAÑA

ES COPIA

---

Ramón Prieto Pérez, mayor de edad, con domicilio en esta Villa, Plaza Nueva 7, 4ª izqda., a petición de D. Julián Guimón, médico de la misma, presento relato fiel de las atenciones que por este Sr. me han sido tenidas y las cuales detallo, para que de ellas haga el mejor uso que crea conveniente.

Herido en el asalto de la cárcel de Larrínaga el día 4 de Enero del corriente año, mis familiares se presentaron en la Clínica de este Sr. exponiéndole la situación en que nos encontrábamos todos los detenidos en el Hospital, donde carecíamos en absoluto de garantías para nuestras vidas, pidiéndole ser ingresado en dicha clínica, a lo cual este Sr. accedió complacido y sin poner ninguna dificultad, cosa que en aquel entonces, la casi totalidad de los médicos que tenían clínicas abiertas, no hacían más que a personas conocidas y bien recomendadas. Más tarde, cuando ya completamente restablecido de mis heridos, la en aquel entonces Dirección de Sanidad pasó una circular a dicho Sr. inquirendo por el estado de mi salud y si estaba en condiciones de ser nuevamente trasladado a la prisión, circular que fue contestada por el Sr.



Guimón en tal forma que hasta dos meses después no fui molestado. Nuevamente los del departamento de Sanidad insistieron transcurridos dos meses, en ver las condiciones en que me encontraba para trasladarme a la Carcel y este Sr. al ver que estaba completamente restablecido y que le anunciaban la visita de un médico para que nos reconociera, me aconsejó y al mismo tiempo habló él mismo con el Dr. Viar, el cual como especialista, me proporcionó un certificado con el correspondiente análisis y alegando entonces ulceración de estómago pude quedarme en su clínica sin que nunca más me volvieran a molestar. Por último, los últimos días de resistencia roja separatista, se caracterizaban por los deseos que estos demostraban de trasladar los presos a Santander; informado yo por una segunda persona de que ese mismo día y por la noche nos trasladarían a Carranza, y que debía de fugarme inmediatamente, le expuse esto al Sr. Guimón, el cual nos facilitó la fuga a mí y a otros varios detenidos que estaban en dicha clínica, y la cual, por su cooperación, fue llevada a feliz término.

Bilbao, 27 de Julio de 1.937.-

-Ramón Prieto- Rubricado.-

Hay un sello en tinta que dice: "Sindicatos Nacionales de la Producción de F.E.T. y de las J.O.N.S.- Secretaría Provincial de Vizcaya".

Es copia

---

Baracaldo 26 de Julio de 1.937. (II Año Triunfal)

El que suscribe, Mariano Cortazar Meratonas, miembro de la extinguida Junta Señorial del Partido Tradicionalista de Vizcaya, Jefe de dicho Partido del Distrito de las Encartaciones y Presiden-



te de la Junta Municipal del Partido en Baracaldo, hace constar:

Que hallándome detenido desde el 23 de Julio de 1936, por ser uno de los dirigentes de dicho Partido, y en los asaltos a las cárceles del día 4 de Enero de 1.937, luchando contra la canalla y asesina marxista, fui atropellado, y a consecuencia de ello quedé herniado, y gracias a las buenas disposiciones del Cirujano Don Julián Guimón, fui operado en su Clínica con solicitud y cariño paternal, cuyas atenciones prodigaba también a otros compañeros de infortunio, distinguiéndonos de los demás enfermos, y amparándonos con una amabilidad sin límites.

Y para que conste firmo la presente en Baracaldo a 26 de Julio de 1.937.

Mariano Cortazar -- Rubricado.

ARRIBA FRANCO

VIVA ESPAÑA

Hay un sello en tinta que dice: "Falange Española Tradicionalista de las J.O.N.S. - Secretaría Provincial.- Vizcaya."

Es copia

Don Juan José de Abaitua Eguidazu, natural de Bilbao, provincia de Vizcaya, de 44 años de edad, estado casado, empleado como contador en la Sociedad Española de Construcción Naval, Astilleros de Sestao, y domiciliado en Sestao, calle Chávarri 79, libre y espontáneamente declaro:

1º.- Que con fecha 19 de Septiembre de 1.936, fui detenido por las hordas rojo-separatistas en mi domicilio de Sestao y trasladado a los calabozos de la cárcel del pueblo, hasta el 10 de Octubre en que fui trasladado a Bilbao al cuartelillo de Seguridad de la calle de Elcano; y encontrándome en el mismo y hacia



mediados del mes de Noviembre se me declaró una epididimitis y reconocido por los facultativos oficiales, diagnosticaron la conveniencia de ponerme a tratamiento, para lo cual elevé al Sr. Director General de prisiones la solicitud correspondiente, pidiendo mi ingreso en la clínica del Dr. Guimón.

2<sup>a</sup>.— Que al solicitar mi ingreso en dicha Clínica le hice a instancias de un amigo, sin que para nada conociese yo al citado Sr. Guimón; y que cuando mi esposa se presentó a dicho Sr. solicitando mi ingreso en su clínica y explicarle mi situación de detenido, le contestó que desde aquel momento ponía a mi disposición un cuarto en su clínica, para que me trasladase a ella en cuanto me autorizasen como así lo hice con fecha 11 de Diciembre de 1.936.

3<sup>a</sup>.— Que desde el primer día de mi ingreso en la clínica, fui objeto de solícitas atenciones por parte del Dr. Guimón, quien en el primer reconocimiento que me hizo me dijo que allí quien mandaba era yo, poniéndose a mi disposición para cuanto necesitase.

4<sup>a</sup>.— Que durante mi larga estancia en la Clínica, pues permanecí en ella hasta la Gloriosa Liberación de Bilbao, también me ha dado ocasión para presenciar el ingreso en la clínica de muchos detenidos, de heridos unos y otros enfermos, llegando en una ocasión y con motivo de una delicadísima intervención a uno de los heridos en la cárcel de Larrínaga, a dar su sangre el Sr. Guimón para una transfusión, de resultas de la cual pudo salvar la vida de aquella pobre víctima del furor rojo. La semana anterior a la entrada en Bilbao del glorioso Ejército Nacional y como corrían rumores del traslado de presos a Santander, propuse al Sr. Guimón mi fuga de su Clínica, no poniendo a mi idea ningún inconveniente, antes por el contrario, me ofreció su apoyo, y efecti-



vamente, quedamos de acuerdo para llevar a cabo mi evasión el lunes 14 de Junio por la noche, para lo cual dejo abierta la puerta del jardín, hizo salir aquella noche de casa a parte de la servidumbre y se llevó al perro guardián. Según me enteré después, tuvo que ocultarse aquella misma noche también el Sr. Guimón, pues querían detenerlo. También debo hacer constar, que lo que yo pagaba por gastos de estancia en la clínica no era ni mucho menos la cantidad que se acostumbra a cobrar.

---

DON CIRRIANO ABAD PONCE DE LEON, médico del Santo Hospital Civil de Bilbao espontáneamente declare:

Que mi padre Don Cipriano Abad, médico de la Sociedad de Altos Hornos de Vizcaya, con residencia en Baracalde, fue detenido y encarcelado, en los primeros días del glorioso movimiento nacional, consiguiendo más tarde ser llevado como enfermo al Sanatorio de dicha entidad. Pero hallándose en él, recibió un aviso aconsejándole que se escondiese porque iba a ser detenido de nuevo y habiéndolo puesto en conocimiento del Dr. D. Julián Guimón, éste le facilitó un refugio en su clínica simulando una gravedad en sus dolencias que entonces no existían.

Lo que por ser ajustado a la verdad manifiesto y consignado en este documento, que coincidiendo en lo sustancial con otro que suscribí en el mes de Junio último firme por duplicado en Bilbao,, el 10 de Septiembre de 1.937. II año Triunfal.

VIVA FRANCO

ARRIBA ESPAÑA

---



Don Isaac Martínez, Presbítero, Coadjutor de la Iglesia Parroquial de Santa María de la Anunciación de Sestao.

D E C L A R O; ante la presencia de Dios, ser verdad lo que a continuación expongo referente a la actuación del Dr. Don Julián Guimón, médico cirujano, Jefe de la Sala ITURRIZAR de Cirugía en el Hospital Civil de Basurto, durante mi estancia en dicho benéfico establecimiento en el período comprendido entre el 23 de Julio a 28 de Agosto de 1.937.

Conoci a Don Julián Guimón por haber sido el cirujano que intervino en la curación de una herida gravísima que padecí, resultado de un vil y cobarde atentado sufrido el día 23 de Julio de 1.936 en la Iglesia Parroquial de Sestao, perpetrado por las hordas rojas.

Debe certificar que dicho Sr. desplegó, respecto a mí, un celo extraordinario y unas atenciones y facilidades poco comunes. Creo firmemente que esto era, precisamente, por mi carácter sacerdotal. Prueba de ello fue el haberme aislado de la Sala común, en la que había infinidad de heridos en el frente de Ochandiano y el tener la atención de curarme en la misma habitación que ocupaba con el fin de ocultar, en lo posible, mi estancia entre aquella canalla.

Por fin, cuando se trató de mi traslado a otro hospital, con el fin de evacuar el civil de Basurto, que ya se pensaba en militarizar, intervino directamente para que no fuera evacuado a Lequeitio precisamente, porque lo iban a ocupar infinidad de rojos trasladados de otros hospitales y del de Basurto, dejando a mi elección el traslado, como así se hizo.

Respecto de manifestaciones y actuaciones políticas me complazco en manifestar que en mi presencia jamás habló de ella ni actuó.



Estos son los datos que gustosísimo doy a conocer, para lo que convenga, en agradecimiento al celo y atenciones que respecto de mi persona desplegó durante mi estancia en el Santo Hospital Civil de Basurto.

Sestao, a 23 de Agosto de 1.937.

-Isaac Martínez - Rubricado.-

Hay un sello en tinta que dice: "Parroquia de Santa María de Sestao".- VIVA ESPAÑA VIVA EL GENERALISIMO FRANCO

ARRIBA ESPAÑA

Es copia

---

DON CIRIACO OLAVARRIA Y UGARRIZA, médico titular de este valle de Orozco (Vizcaya)

CERTIFICO: Que durante mi estancia en la sala de detenidos del Santo Hospital Civil de Bilbao, donde como tal detenido estuve durante 5 meses, fui visitado con frecuencia por mi compañero Dr. D. Julián Guimón, quien se interesó constantemente de mi salud y por mi pronta libertad, para conseguir la cual, hizo insistentes gestiones.

Además, habiéndome agravado en la enfermedad que padecía, solicité mi traslado a una clínica particular, y al enterarse de ello el Sr. Guimón, se ofreció desinteresadamente para que en caso de llevarse a efecto ese traslado, lo fuera a su clínica.

Para que así conste expido el presente en Orozco a 27 de Agosto de 1.937.-

---

El que suscribe JULIAN ARISTONDO APELLANIZ, vecino



de Eibar, de 43 años de edad, casado y de profesión grabador, y domiciliado en Bidebarrieta 54, 2º piso, derecha:

CERTIFICA: Que D. Julián Guimón Rezola, de treinta y siete años de edad, actualmente detenido en la cárcel de Larri-naga de Bilbao, con ocasión del primer bombardeo aéreo de Eibar por los aviones nacionales que motivó muchas detenciones de personas derechistas, influyó por su carácter de médico para que el suscribe no fuera detenido, a pesar de haber tomado parte activa en las elecciones y haberse destacado bastante en la propaganda del bloque de derechas.

Asimismo, ha de hacer constar que el citado Sr. Guimón le prestó ayuda continua durante los siete meses que el que suscribe estuvo desterrado en Plencia.

Y para que así conste donde convenga, y para satisfacción del citado Sr. Guimón, expido la presente certificación en Eibar a 17 de Agosto de mil novecientos treinta y siete.

II año Triunfal.

Los que suscriben, en nombre de la Delegación de FALANGE ESPAÑOLA TRADICIONALISTA Y DE LAS J.O.N.S., de esta Villa de Eibar.

CERTIFICAN: Que D. Julián Aristondo Apellaniz que figura como expedidor de la adjunta certificación, es persona de orden y afecta al Glorioso Movimiento Nacional.

Y para que así conste donde convenga, expido la presente certificación, en Eibar a diez de Agosto de mil novecientos treinta y siete.

II año Triunfal.



Confirmando el Oficio a V. dirigido por mi coadjutor Don Matías Echevarría, tengo el gusto en darle las más expresivas gracias por haberse prestado en circunstancias difíciles a guardar objetos de culto de gran valor propiedad de esta Parroquia de mi cargo, objetos que al terminar el peligro con la venida a Bilbao del Glorioso Ejército Nacional, se apresuró Vd. a devolverlos.

Pido al Señor se digne premiar con sus mejores bendiciones este gran servicio prestado a esta Parroquia.

Dios guarde a Vd. muchos años.

VIVA ESPAÑA

\*José Santiago - Rubricado.-

Hay un selbo en tinta que dice: -"Parroquia de los Santos Juanes de Bilbao".-

Sr. D. Julián Guimón.-

Es copia.



El que suscribe, JOSE PEREZ VAL, médico del Hospital Civil de Basurto de Bilbao, espontáneamente:

DECLARA Que el día 24 de Juliá de 1.936 fui detenido en el Hospital Civil y conducido a Orden público con consentimiento del Director que lo era entonces D. Jesús Arrese. Inmediatamente avisado que fue Don Julián Guimón, rogó que fuera trasladado al Hospital y se respetase mi vida. El ruego del referido Sr. fue atendido ya que no estaba sentenciado a quedarme en los sótanos de aquella dependencia. Durante algún tiempo, por mi miedo al contacto con los milicianos que venían constantemente y guardias de asalto al Cuarto de Socorro, se me concedió permiso para no pasar por allí, pues era necesaria mi presencia, por la cantidad de heridos que venían y el déficit de personal que poco a poco era movilizado, hallándose Don Julián Guimón siempre dispuesto a favorecerme en todo lo que le pedía para librarme de la persecución de que allí era objeto.

A principio del Movimiento las noticias que me llegaban de otras personas comprometían mi situación y entonces solicité de Don Julián Guimón el ser trasladado a otro sitio más seguro y de menos publicidad, pues aunque traté de que se suprimiera mi segundo apellido, no todos los cumplían al referirse a mí, y entonces el Sr. Guimón me ofreció incondicionalmente su casa.

Solicité ese traslado del Director Sr. Arrese, pero este de malas formas me dijo que no accedía porque me encontraba en el Hospital en prisión atenuada, y él era el que tenía que responder.

Tuve que presentarme en Sanidad Civil, que disponía de los médicos no colegiados, con la sola finalidad de llevarnos a Asturias y al ir a dar el nombre, un Sr. a quien yo no conozco.



se me acercó y me dijo que yo no diera el nombre y viviera tranquilo. Después he sabido por el Sr. Escudero Pascual que el referido Sr. le dijo que no me apuntaban porque estaba muy expuesto a que me dieran un tiro y me consta por conversaciones posteriores, que esta gestión que me salvó fue debida a Don Julián Guimón, quien expuso mi situación al Sr. que me amparó en este momento.

Al ser movilizado me veía en idéntica situación por causa de mi apellido pues toda la persecución obedecía al hecho de ser hermano del Teniente Del Val, significado en los sucesos de Octubre de 1.934 y mal visto entre las masas rojo-separatistas. Al ser presentado como tal movilizado en Sanidad se me consoló por el Sr. Guimón, y no fui sacado del Hospital sino que quedé allí igual que antes y sin graduación ninguna, que no me interesaba.

Próxima la liberación de Bilbao, tres días antes, era perseguido y según referencia con pistola, como se nos perseguía a los que habíamos permanecido aquí durante todo el Movimiento para ser evacuados, pues se nos conceptuaba como fascistas; pues bien, con el consentimiento del Sr. Guimón y dándome toda clase de facilidades fui entonces ocultado en la clínica de enfermeras; en un armario primero y en un cuarto después como enfermo, sabiendo donde me hallaba sólo la Hermana y él, que fue quien me anunció cuando pasó el peligro que saliera al entrar el Ejército en Bilbao.

Cuando recibió el primer sueldo de su cargo de Sub-Director, el Sr. Guimón en el mes de Abril de 1.937 nos llamó al Sr. Escudero Pascual y al que suscribe, manifestándonos que lo que recibiera de dicho cargo lo entregaría en la Clínica para gastos de la misma y mejoras y para dar algún sueldo al personal que no cobraba y que era gente de derechas como a él le constaba y que estaba en situación angustiosa económicamente; así entregó de pri-



mera intención 625 pesetas a D. José Escudero Pascual y de ese sueldo se dió también dinero a D. Julián Martín Aragón, muchacho de derechas y sobrino de Adrada, muy significado como de derechas en esta Villa, a D. Joaquín Ojeda San Emeterio que había sido detenido y a la Srta. enfermera Teresa Laiseca.

Después me entregó a mí el resto de la cantidad que cobró como honorarios por el referido cargo, ascendiendo a 2.500 pts. para comprar máquina de escribir para la Clínica y montar un pequeño laboratorio; de la compra de la máquina quedó encargado el Sr. Escudero Pascual y del laboratorio el que suscribe.

En el transcurso de los once meses de dominio rojo no le oí ni una sola palabra feferente al actual Movimiento que indicara fuese desafecto al nuevo régimen Nacional. Esto lo pude observar teniendo en cuenta que convivía con él por el exceso de trabajo de la clínica la casi totalidad del día.

Siendo la tarjeta de aval para mí un verdadero conflicto le dije a él que me la avalara y me contestó que no tenía relación con nadie y que por lo tanto no me podía servir y efectivamente yo que estaba en la creencia que pertenecía a Acción Vasca pude comprobar que no era así, pues me enseñó su propia tarjeta avalada por otra tercera persona de otro partido distinto.

Todo esto es cuanto tengo que manifestar bajo juramento de que cuanto hay expuesto es sólo la verdad y para que conste donde convenga firmo por duplicado este documento reproducción en lo esencial de otro que firmé en el mes de Junio último.

Bilbao 9 de septiembre de 1.937.- II año Triunfal

VIVA FRANCO      ARRIBA ESPAÑA



El que suscribe JOAQUIN OJEDA, practicante del Hospital Civil de Bilbao y afecto siempre al Glorioso Movimiento Nacional, espontáneamente declaro:

Que no obstante estar conceptuado como persona de derechas, recibí durante el dominio rojo toda clase de atenciones del Dr. D. Julián Guimón, que a fin de que fuese respetado y continuase en el Hospital me colocó en los puestos en que pudieran parecer más necesarios e indispensables mis servicios y llegó a abonarme sueldo con cargo a sus ingresos, concediéndome además el privilegio de dormir en el internado con los Sres. Médicos como el mejor medio de garantizar mi seguridad personal; sin que otro practicante alguno disfrutara de ese beneficio.

Y para que conste firmo por duplicado este documento reproducción en lo esencial de otro que suscribí en el mes de Junio último.

Bilbao, 9 de Septiembre de 1.937.- II año Triunfal.

VIVA ESPAÑA

VIVA FRANCO

---

El que suscribe, Juan Acha Leguina, de 43 años de edad, con domicilio en el Muelle de Churruca, 28, de Olaveaga, fundador de la Unión Patriótica, y actualmente afiliado a Falange Española de las JONS., libremente y bajo juramento, declara:

Que en Marzo de 1.936 fue admitido en la Clínica de Don Julián Guimón, y a causa de una hemorragia tuve que ingresar nuevamente en su Clínica, con fecha 21 de Septiembre. Al hacerlo, puse al corriente a Don Julián Guimón de mi signifi-



cación derechista, indicándole que era perseguido por elementos afectos al gobierno rojo separatista, rogándole me permitiese prolongar mi estancia en la Clínica hasta que desapareciese este peligro.

Don Julián me dió toda clase de ánimos, ofreciéndoseme incondicionalmente, y su Clínica, para que en ella pudiese continuar alojado hasta que hubiese desaparecido para mí todo el riesgo, y así lo hice durante diez meses.

Recuerdo que con motivo de un bombardeo en el mes de Septiembre, nos bajaron a todos los enfermos al sótano de la Clínica, donde una visitante a un enfermo hizo manifestaciones contrarias al Glorioso Ejército Español en el momento en que llegaba Don Julián Guimón, quien se encaró con ella reprendiéndole severamente, diciéndole que en su casa no consentía que nadie se expresase en los términos que lo había ella hecho, siendo testigos de cuanto antecede todos cuantos allí nos encontrábamos reunidos, recordando, de momento, los nombres de las personas que a continuación cito, y que no dudo no tendrían inconveniente alguno en declararlo como yo lo hago:

Don Federico Urcarregui, Abad (médico q.e.p.d.) y su señora, monjitas y personal de la Casa, así como otras personas más.

También quiere hacer constar el que suscribe que no me unía amistad alguna con Don Julián Guimón hasta que lo conocí en su Clínica.

Olaveaga 24 de Julio de 1.937

ARRIBA ESPAÑA

VIVA FRANCO

VIVA ESPAÑA



AUDITORIA DE GUERRA

DE BILBAO

JUZGADO MILITAR LETRA F.

(EJECUCIONES)

El Coronel Encargado del Despacho de la Secretaría de Justicia de la Plaza de Burgos en oficio que se une al expediente de Indulto de Don Julián Guimón Rezola, dice lo que sigue. "Burgos 17 de Abril de 1.940. El Jefe de Asesoría y Justicia del Ministerio del Ejército, en escrito de fecha 15 del actual me dice: de Orden comunicada del Sr. Ministro, que se ha servido decretar el indulto de la pena que le queda por cumplir a favor del condenado DON JULIAN GUIMON REZOLA, debiendo quedar subsistente la inhabilitación para cargos públicos y derechos políticos, aunque pudiendo ejercer su profesión de Médico, devuelvo a V.E. el expediente para diligencias de ejecución de aquél rogándole que llevadas a cabo aquéllas dé cuenta de haberle verificado. Lo que traslado a V.I. en unión del expediente, para su conocimiento y efectos. Dios guarde a V.I. muchos años".

Lo que traslado a Vd., para su conocimiento y satisfacción.-

Dios guarde a Vd. muchos años.

Bilbao, 22 de Abril de 1.940

EL JEFE MILITAR LETRA F.

Firmado y rubricado.

Hay un sello en tinta que dice: Auditoria de Guerra. Bilbao.

Juzgado Militar Letra

SR. DON JULIAN GUIMON REZOLA.



MINISTERIO DE JUSTICIA

SUBSECRETARIA

Comisión de Rehabilitación  
y Penas Accesorias

Expediente núm. 4.962

El Sr. Ministro ha acordado, con esta fecha, lo que sigue:

"Excmo. Sr.: Visto el expediente incoado, por la Comisión de Rehabilitación y Penas Accesorias, a instancia de D. José Julián Guimón y Rezola, con domicilio en Bilbao, Gran Vía 47, que solicita la cancelación de sus antecedentes penales.

RESULTANDO que el interesado fue condenado en fecha 30 de junio de 1.937 por el Consejo de Guerra de Bilbao a la pena de reclusión perpetua, conmutada por seis años de prisión menor por el delito de rebeldía.

RESULTANDO que la condena fue firme, por aprobación de la Autoridad Judicial Militar y quedó extinguida en 20 de mayo de 1.943.

CONSIDERANDO que mediante los documentos aportados se ha acreditado la buena conducta del solicitante, que la condena ha quedado totalmente extinguida, que han transcurrido los cinco años del plazo de prueba señalado en el art. 4º del Decreto de 22 de Mayo de 1.943 y se han cumplido los requisitos exigidos por la Orden de 27 de Diciembre de 1.944.

CONSIDERANDO que la Comisión de Rehabilitación y Penas Accesorias elevó propuesta a este Ministerio estimando procedente otorgar los beneficios de la rehabilitación solicitada.

Vistos, el art. 118 del Código Penal, art. 4º del Decreto de 22 de Mayo de 1.943. Orden de 27 de Diciembre de 1.944 y demás disposiciones legales pertinentes.

Este Ministerio de conformidad con la propues-



ta formulada, ha dispuesto:

Que accediendo a lo solicitado se cancele la nota de antecedentes penales, obrante en el Registro Central de Penados y Rebeldes, contra JOSE JULIAN GUIMON Y REZOLA, dimanante de la condena de reclusión perpetua, conmutada por seis años de prisión, que le fue impuesta en causa núm. 5337 por el Consejo de Guerra reunido en Bilbao en fecha 30 de junio de 1.937 por el delito de rebelión.

Lo que traslado a Vd. para su conocimiento y demás efectos.

Dios guarde a Vd. muchos años.

Madrid, 22 de junio de 1.950.

EL PRESIDENTE DE LA COMISION

Firmado y rubricado.

Sr. D. José Julián Guimón y Rezola.- Gran Vía, 47. Bilbao.
