# Supplementary material
Source: Elsevier journal article supplement (https://www.sciencedirect.com/science/article/pii/S217357861830012X)
Supplement: mmc3 [file S217357861830012X:mmc3.pdf]

## **EL PORVENIR DE LA LUCHA SANITARIA EN VIZCAYA**

### **Conferencia pronunciada por radio el 26 de abril de 1933, a raíz de la celebración de la Primera Semana de Hospitales.**

La Lucha sanitaria profundiza sus raíces hasta las entrañas mismas de la vida del ser humano, al que quisiera ver nacer físicamente más perfecto mediante la adecuada preparación de sus progenitores; extiende sus ramas por todas las etapas del desarrollo del hombre, no sólo del hombre enfermo sino del sano –que nunca lo es del todo- para procurarle todo el bienestar compatible con su frágil condición; y ofrece frutos aprovechables en las más opuestas esferas de las actividades sociales: desde la construcción de la casa, de la escuela, del taller, hasta la organización de los Municipios y la más compleja de los estados modernos. Por éstas hacen más en la lucha antituberculosa, por ejemplo, el arquitecto edificando una vivienda ventilada y soleada y el maestro enseñando a sus discípulos a no escupir en el suelo que el tisiólogo poniendo en cura la tuberculosis declarada; hace más un concejal entusiasta logrando surtir de aguas excelentes a su Municipio que el clínico dedicado a curar una epidemia de tifus, enfermedad casi desconocida en poblaciones bien urbanizadas; y hace más el economista que logra disminuir el coeficiente de pobreza de un país, que toda la farmacopea destinada a combatir las enfermedades nacidas de la carencia de los elementos más indispensables para el normal sustento de la vida.

Vizcaya se ha enorgullecido siempre de sus instituciones benéfico-sanitarias, y las ha exhibido con legítima satisfacción ante el mundo, como la mejor muestra de la capacidad creadora y de la nobleza de sentimientos del pueblo vizcaíno. Al logro de esta brillante situación había contribuido mancomunadamente la caridad privada –extraordinariamente generosa en este país- y los esfuerzos de las corporaciones oficiales.

Pero la crisis económica ha mermado considerablemente las fuentes de los ingresos a la vez que aumentado las solicitudes de asistencia benéfico-social. Así, no solamente se ha visto detenido el progresivo movimiento de adaptación a las renovadas necesidades de cada día mediante la sucesiva creación de instalaciones sanitarias, sino que varias de las hasta ahora creadas arrastran una vida precaria. En las campañas

públicas de estos días se han expresado datos reveladores de la situación actual: Instituciones como el Hospital no tienen capacidad económica para dar cabida a la creciente afluencia de pacientes; los enfermos mentales han de ser trasladados, en parte, a establecimientos forasteros, por falta de consignación para terminar las obras del de Zamudio; detrás hay una lista de varios...posible; no se dispone de una sola cama para niños tuberculosos...

Semejantes estados de la conciencia colectiva han permitido en otros países encauzar los problemas sanitarios hacia una solución radical y definitiva; y a estas soluciones radicales aspiran hoy, seguramente, los sentimientos humanitarios de los vizcaínos.

Para resolver automática y definitivamente los costosos problemas de la sanidad, se ha recurrido a otras naciones, además de a la caridad, a la intensificación en las aportaciones de las Corporaciones y al seguro obligatorio de enfermedad.

Una ley de coordinación sanitaria recientemente aprobada pone en las manos de un a modo de junta central sanitaria provincial amplios recursos y atribuciones para propulsar y enlazar los servicios benéfico-sociales en España. Al quedar, según parece, eximida de esta ley Vizcaya -autonomizada en cierto modo en este punto- se presenta a las Corporaciones Oficiales ocasión excelente para hacer aquí, superando, lo que el Estado proyecta hacer en otras provincias; para intensificar y coordinar por propia cuenta, con esfuerzo de sus ingresos, los servicios benéficos dependientes de los Municipios y de la Diputación.

Un organismo central de sanidad vizcaína, constituido por representaciones de los Municipios, de la Diputación, de los establecimientos benéficos y del personal técnico, con la ampliación de recursos permitida por la ley de coordinación, aparece como una promesa real en medio de la difícil situación presente. Y, acaso, ese mismo organismo pudiera ser el iniciador, en colaboración con las clases sanitarias, del seguro obligatorio de enfermedad.

El seguro obligatorio de enfermedad para las clases más necesitadas ha sido implantado en 20 naciones europeas. Contribuye a su sostenimiento el obrero o empleado, el patrono y el Estado. Sólo con las enormes disponibilidades movilizadas con este seguro ha podido hacerse frente en su totalidad a las fabulosas cifras que exige

la completa organización de la lucha sanitaria. Italia dedica 20.000 camas para asistencia de tuberculosos, con un presupuesto de 500.000.000 de liras para construcción de edificios, gracias a un seguro integrado por 8 millones de personas modestas afiliadas (22 millones en total de beneficiarios) que aportan 5 liras por individuo, al igual que su patrimonio respectivo. Si los 70.000 obreros vizcaínos, los patronos y las Corporaciones aportaran 2 pts. mensuales, dispondría el seguro de una suma de 5.000.000 de pts. anuales para atenciones benéficas; es decir, una suma suficiente en el momento actual.

El Estado español, al aceptar el convenio de Ginebra de 1932, se ha comprometido a instaurar el seguro obligatorio de enfermedad en todo su territorio. La apuesta en marcha del seguro será seguramente lenta, por lo que hasta ahora pueda traslucirse.

Acertado sería –conforme exponía en reciente conferencia un distinguido médico-sociólogo bilbaíno- que antes de que se movilice la lenta máquina burocrática del Estado, se solicitara para Vizcaya el derecho a crear el seguro de enfermedad. Implantado por los vizcaínos –que tienen experiencia del asunto a través de numerosas iniciativas ya existentes- el seguro podría evitar aquí muchos de los inconvenientes que hacen discutible su eficacia en algunas partes.

En suma, la Semana Hospitalaria ha puesto en descubierto lo mucho que en materia sanitaria precisa hacerse aún entre nosotros para el logro de aspiraciones de tan evidente justicia social como el rodear a todos los vizcaínos –en lo humanamente posible- de las máximas garantías en la prevención de enfermedades y en la aplicación de todo: los médicos que, en el estado actual de la ciencia, tienden a su curación. Para conseguir estos objetivos es conveniente contar con la caridad –acrecentada si es posible-, con el mancomunado esfuerzo de las Corporaciones enlazadas en el Conjunto de Coordinación Sanitaria y con la implantación de un acertado seguro obligatorio de enfermedad.

## **AUREOLA TRADICIONAL DEL MÉDICO**

### **Discurso pronunciado al ser nombrado Presidente de la Academia de Ciencias Médicas de Bilbao en 1967.**

Uno de los cambios que primero llaman la atención es la mengua sufrida en el aprecio por la sociedad del médico, rodeado antes de una bien ganada aureola de entrega y sacrificio.

La figura del médico de cabecera, amigo y consejero de la familia siempre dispuesto al consuelo como a la receta, con cuyas fórmulas, a veces inoperantes, consiguió mayor prestigio que con la Medicina actual; la estampa romántica del médico rural, sufriendo limitaciones de su arsenal profesional y penalidades personales y familiares sin cuento, están en trance de desaparecer o, por lo menos, de perder sus caracteres típicos por la presión de una serie de circunstancias que afectan decisivamente a su profesión.

Persisten, claro está, los visitantes de ciudades y villas desempeñando honorable y tenazmente su misión, pero la tradicional devoción hacia ellos se ha desvanecido en gran parte. Continúa una legión de médicos rurales recorriendo estoicamente grandes distancias para cumplir con su deber bajo lluvias y sobre barro, pero su paso no despierta ya en los convecinos los sentimientos de admiración y respeto de otras horas, y necesitan quizá recurrir a los eternos consuelos de la Naturaleza, como el poeta argentino Roque Pérez, que exclama en unos de sus versos: “Hay momentos dulcísimos también en la campiña, que no tenéis vosotros, médicos ciudadanos”... y en otros: “Me gusta hacer a pie mis visitas de médico, olerán así en mis manos, a flores, los enfermos”.

¡Cuánto había y hay que aprender de tales compañeros! Ejercí varios años cerca de un destacado práctico de pueblo –personalidad extraordinaria en muchos aspectos-, a quien considero uno de mis mejores maestros. Y no me extraña que el profesor August Mayer, que durante algún tiempo trabajó también junto a un médico rural, escriba hoy: “Sus enseñanzas me sirvieron de ayuda más tarde para mis propias lecciones clínicas. Con frecuencia repito a mis oyentes: “no es ninguna obra de arte ser buen especialista, pero descubrámonos en presencia de un buen médico práctico en Medicina general”.

La otra parte del binomio relacionado con la enfermedad, el enfermo, era, por lo general, creyente, a menudo incondicional de su médico, sin las complicaciones del semi-instruido, ahora en progresiva proliferación. Ocurría esto en todos los estratos sociales, en especial en el ambiente rural, donde siempre –también ahora, aunque menos- los enfermos han sido, además de físicamente más resistentes, moralmente más sufridos, resignados y agradecidos, según experiencia personal corroborada por la de colegas de otras tierras.

Probablemente es innecesario advertir que los tipos de médico y enfermo esbozados hasta aquí y en lo sucesivo con perfiles tan rotundos, tan desprovistos de los matices claro-oscuros propios de toda condición humana, pretenden tan sólo representar un vago esquema sin el menor ánimo discriminatorio, apologético por un lado y peyorativo por otro. Se requiere simplemente destacar el distinto espíritu prevaleciente en una y otra época en los dos principales protagonistas del drama de la enfermedad. Cuál de los dos espíritus sea mejor, es cuestión de discutible apreciación persona.

¿Por qué estas diferencias? Fundamentalmente, en el médico de ayer y en el de hoy albergan virtudes semejantes: abnegación, paciencia, piedad. Predominan o eran más aparentes antes, no por causas atribuibles exclusivamente al individuo, sino al producto del hombre y de sus circunstancias. Y las circunstancias son ahora muy distintas: crisis del modo personal, humano, a veces con ribetes de mágico de ejercer la profesión: enorme incremento de los conocimientos médicos: tecnificación, especialización y socialización de la Medicina; todo ello con el trasfondo de un mundo en total transformación. De esto vamos a ocuparnos muy someramente.

Lo que hay en el modo de ejercer la profesión de intercambio humano, entre nuestra propia personalidad y la del enfermo, ha experimentado a lo largo de los tiempos las consecuencias de grandes variaciones ambientales además de las lógicas individuales. Es difícil definir lo que pudiéramos considerar norma ideal de este intercambio con tanta perfección como con las siguientes palabras de Séneca, que nos sirven de patrón de comparación con otras normas, extremadas en más o en menos de la época precedente y de la actual.

“¿Por qué al médico y al preceptor les soy deudor de algo, por qué no cumplo con ellos con el simple salario? Porque el médico y el preceptor se convierten en amigos nuestros, y no nos obligan por el oficio que venden, sino por su benigna y familiar

buena voluntad. Así, al médico que no pasa de tocarme la mano y me pone entre aquellos a quienes apresuradamente visita, y prescribeme sin el menor efecto lo que debo hacer y lo que debo evitar, nada debo porque no ve en mí al amigo, sino al cliente... Aquél que dio más de lo necesario es buen médico: temió por mí; le conmovieron mis gemidos; no se contentó con indicarme los remedios, sino que me los administró; se sentó entre los más solícitos para conmigo: fui par él primerísima preocupación. Para con ése estoy obligado, no tanto porque es médico, como porque es amigo”.

De manera sencilla y gráfica simboliza esto mismo el “New York Hospital” encabezando todos sus impresos con la imagen de la parábola del “Buen Samaritano”, atendiendo piadosamente al judío, miembro del país enemigo, herido por los ladrones y abandonado por el sacerdote y el levita de su propio país, añadiendo al pie de la figura las palabras de Jesús: “Ve y haz tú lo mismo”.

El grado de afecto –de amor, en definitiva- reclamado por la mentalidad ambiental como complemento de la técnica de la Medicina, es decir, como superación de la condición de naturalista del médico, ha cambiado, decíamos, no sólo a través de los siglos, sino en los pocos decenios cuyo parangón hacemos. En efecto, en época todavía no lejana, la imagen del médico que flotaba en el ambiente era una peligrosa mezcla de encomio y de exigencia, ambos extremosos. Hasta las personas menos cuidadosas en el cumplimiento de sus propios deberes empleaban antes –menos ahora- tópicos como éstos: “La Medicina es un estado, como el matrimonio o el sacerdocio, del que no puede apearse”. “El médico ejerce una misión, más que una profesión, y en la misión hay cierto grado de religiosidad y apostolado”. “El médico tiene que dar su alma, “desalmarse”, “desvivirse” por su enfermo”.

Ha sido tan total la sumisión de algunos colegas a cánones tan abusivos, que ha hecho surgir, no rara vez, además del enfermo –problema, otro paciente, moral, y hasta físico. No sospechan sus clientes que la noche del médico ha sido acaso más inquietante que la suya y que, en la visita tempranera, va tanto a atenderle como a calmar el reconcomio de su alma meticulosa; no se dan cuenta es comprensible que así sea- que el buen médico sufre con ellos y para ellos, y que sus energías morales, y aún las físicas, tienen un límite.

Médicos así han existido y existirán siempre, aunque en proporción inversa a la rapidez con que se deshumanice la Medicina. Me viene el recuerdo de un santo varón, ya desaparecido, que nos confesaba su invencible envidia de la sencilla paz, del equilibrio interior, reflejado en el rostro de su portero, encajonado en la modestísima cabida del portal, cuando regresaba a su domicilio angustiado con los problemas de alguno de los pacientes operados, a los que atendía con tanta solicitud como pericia.

Como todo lo que venimos diciendo, esto no es producto exclusivo de una época, ni mucho menos. Es gloria de nuestra profesión que, todavía recientemente, el Presidente de la Asociación Médica Americana, en su mensaje anual a los trescientos mil afiliados, haya creído oportuno contribuir a calmar angustias profesionales en los siguientes términos:

Debe Vd. considerar si el bien que puede hacer es más importante que su aflicción ante el fracaso. Tendrá fracasos, y puesto que es Vd. humano, podrá haber pacientes que se habrían salvado si no hubiera cometido un pequeño error en el diagnóstico o en el tratamiento. Pero si se deja dominar por su pena sufrirán las consecuencias sus restantes pacientes. Vd. necesita confianza en sí mismo superior a la de otras profesiones. Debe bastarle saber que ha hecho cuanto podía y que, si erró, no volverá a errar.

¿Qué había numerosos individuos y grandes sectores con sólida formación moral y con espíritu distinto? Indudable. He aquí un solo ejemplo. William Mayo, el mayor de los hermanos, decía según su biógrafo Regli: “En la Medicina no hay lugar para el sentimentalismo, porque la simpatía es un lujo que mal puede permitirse un médico”, Verdad es que William era el “duro” y su hermano menor el “blando”. Mas dominó el espíritu de aquél, según hemos podido comprobar personalmente, pues en la Clínica Mayo, prodigiosa desde muchos puntos de vista, el orden, la laboriosidad, el alto nivel de preparación de sus miembros y los generosos donativos para investigación son más encomiables que la relación social y anímica entre médico y enfermo. En cambio, el mencionado hermano mayor tenía colocado en su despacho un cuadro con el conocido aforismo de Emerson: “Si un hombre puede predicar un sermón, escribir un libro o hacer una ratonera mejor que su vecino, el mundo abrirá camino hasta su puerta”. Y así fue. Edificaron la Clínica en un páramo y de todo el mundo acuden a ella los enfermos.

Este empleo de la sociedad, tan chocante para el galeno tradicional, en convertirle en rueda de complicada maquinaria, tiene muchos inconvenientes, pero la ventaja, cuando menos, de diluir gradualmente su responsabilidad, antes total. Por un lado, el progreso de los conocimientos, gracias a los cuales se resuelven muchos problemas antes agobiantes, y por otro, la organización sistematizada del trabajo, permiten que el médico no tenga que sufrir tanto volcar su corazón con tanta frecuencia. Le ocurre lo mismo que pasa con la caridad: aquella forma de caridad sencilla, inmediata, directa y entrañable de un hombre ante la desgracia de otro, va siendo sustituida por la civilización con complicados organismos que la ejercen a través de intermediarios de modo mucho más eficiente, pero también muchos menos entrañable.

### **Influencia mágica.**

Hemos aludido a la influencia mágica. Dominante en las formas de vida que suelen llamarse “primitivas” sigue vigente en amplias zonas de la sociedad cultas. Conocimos muy de cerca en la pre-guerra una fase de notable expansión, de explosión podríamos decir, con el ruidoso y prolongado episodio del asuerismo.

Es por eso acertado cultivar honestamente el significado de la frase de Baliút: “El médico es el primero de los medicamentos que él prescribe”. Y la otra no recuerdo de quién: “El primer acto del médico debe ser dar cordialmente la mano al enfermo”.

## **GRANDES TRANSFORMACIONES DE LA MEDICINA**

La principal causa de los cambios mencionados y de los por mencionar, todos sobradamente conocidos por Vds., es el progreso experimentado por la Medicina desde los años treinta de este siglo. Como escribía Marañón, “Si alguna cosa da idea de la capacidad creadora de la mente humana, esta cosa es, sin duda, el formidable avance de la Medicina en los últimos años. Contemplando estas maravillas surge la idea de que es un verdadero milagro”. Y los milagros, añadimos nosotros, llevan trazas de continuar.

Lo difícil no es en estos momentos disponer de buenos recursos, sino saber elegir los óptimos.

### **Cultura médica.**

Algo semejante ocurre con la cultura médica, El fulgurante progreso viene acompañado, de grandes facilidades de información. Ya no es necesario el dominio de



las cuatro lenguas cultas extranjeras, como recomendaba Cajal; con añadir a la vernácula un modesto conocimiento de inglés, basta, aunque nunca sobran las otras. La preponderancia de la cultura médica anglosajona en la civilización occidental es uno de los hechos notables de los últimos lustros. En mis tiempos de ante-guerra en países germanos, numerosos médicos norteamericanos pasaban en grupos sucesivos perfectamente organizados por los Servicios dirigidos por figuras prestigiosas. Ahora se han invertido los desplazamientos. Todo médico alemán que se precie viaja a Estados Unidos.

Visité hace 20 años el edificio donde se publica el J.A.M.A. en Chicago; tenía tamaño comparable al Hotel Carlton bilbaíno.

Un curioso estadístico Schafer, ha calculado que para mantenerse al corriente de las novedades de la Medicina Interna serían precisas de 60 a 80 horas diarias. No es extraño que, en medio de esta jungla, las comunicaciones de Fleming sobre la acción bacteriostática del “*penicilium notatum*” pasaran desapercibidas durante varios años.

Los libros voluminosos son necesarios para raras consultas o para esparcimiento. Lo que se precisa perentoriamente son buenos compendios, periódicamente revisados. Han escaseado siempre, más ahora. Y la razón es sencilla: lo más difícil es hacer un buen libro resumido y lo más lamentable, la increíble supervivencia de los “apuntes” para estudiantes, que debieron haber sido condenados hace decenios al fuego depurador.

¿Hasta dónde llegará este desarrollo tecnológico? Siempre ha sido aventurado predecir el porvenir, pero todo puede esperarse o temerse. Con motivo de inaugurarse otro curso, tuve el honor hace muchos años de leer en esta Academia un trabajo con el título “Presente y porvenir de la Cirugía”. Su lectura me resulta ahora decepcionante por lo cortas que quedaron mis predicciones. ¡Y hoy corre mucho más veloz que entonces la rueda de los acontecimientos!

Estamos en la era de lo que Marañón llamó “dogmatismo de la técnica, peligroso para la buena marcha de la Ciencia y sobre todo para la buena práctica de la Medicina”. Cuanto más tratamos con máquinas tanto más se siente uno inclinado a imitarlas. Corremos el riesgo de ir olvidando que no hay nada más fundamental en el quehacer del médico que su relación inmediata con el enfermo, expresada en frase corta y certera por Jiménez Díaz: “Clínica es lo que ejercita un hombre frente a otro”.

El médico se proletariza y pierde prestigio. En cambio, incrementa su prestigio la Medicina, gracias precisamente al trabajo en sistema organizado, en equipo, en el que el individuo se desvanece.

### **Especialización.**

Corolario de la extensión de la cultura y de los recursos técnicos ha sido la promoción de nuevas especialidades y la subdivisión de muchas ya existentes.

Que la multiplicación de especialidades tiene grandes ventajas es evidente. Que tiene inconvenientes, también. El público exige el especialista, a lo que tiene derecho, pero también desconfía de personas muy competentes porque se llaman médicos generales, y esto es sensible.

Afortunadamente en países que nos marcan la pauta en tantas cosas –no todas buenas–, y nos seguirán marcándola, lo queramos o no, como Estados Unidos, hay fuerte reacción a favor de la rehabilitación del médico general, muy depreciado también allí hasta hace pocos años; y en Suiza, para titularse internista se requieren estudios muy extraordinarios.

Nada puedo añadir al perfecto conocimiento de la materia por Vds. Acaso me sea permitido recordar a los jóvenes que se debe llegar a especialista por superación, nunca por limitación. Y que frente al espíritu de desintegración actual es preciso mantener una actitud integradora, resumible en lo tocante a especialidades quirúrgicas en el concepto hipocrático del cirujano como “médico que sabe operar” o en la frase del patriarca alemán de la cirugía Bier: “Creo que el cirujano, antes de actuar como tal, debe formarse médico y pensar en médico”.

### **Socialización**

Considerando que la salud es un capital público, los Estados han tomado en sus manos, de un modo más o menor general, la regulación de las actividades médicas. La eficacia y la carestía en la Medicina actual y el deficiente estado de salud de la población, principalmente de la clase proletaria, son, como todos saben, las razones aducidas.

No me compete opinar sobre los mil problemas sociológicos, económicos, administrativos y sanitarios que plantea la asistencia socializada. Me limito a transcribir

una opinión que considero ecuánime: “La socialización de la Medicina es un suceso histórico irreversible y justo, pero la inexorabilidad histórica y la indudable justicia del suceso no deben convertir en intocables los modos con los que técnicamente se realizan”.

Desde el punto de vista de la orientación de esta charla, lo único digno de anotarse es el patente conflicto entre la socialización y la tendencia crecientemente personalista o antropológica de la patología actual, con el consiguiente deterioro de la relación entre el médico y el enfermo. Aquel modo de ejercer la profesión por nuestros antecesores, aquella fórmula que hacía que el médico y el enfermo se convirtieran tantas veces en amigos, al inmiscuirse entre ambos un tercer factor, fruto de la socialización, viene desapareciendo desde hace lustros. Es la crisis de la Medicina liberal, que con este título describe Hatzfeld en un libro tan repleto de textos de leyes y protocolos, nombres y funciones de organismos y cifras de cotizaciones y sueldos, que su lectura, además de difícil, resulta penosísima para el médico tradicional.

### **Necesidad de volver al espíritu antiguo**

Ante esta situación, obligado a abandonar cada vez más las filas de las dedicaciones liberales, el médico debe esforzarse sin embargo en seguir siendo médico, en conservar o recuperar las cualidades tradicionales que sean todavía adaptables a nuestro tiempo. Es mucho exigir de nosotros, pero debemos procurarlo, cuando menor como meta ideal. ¿Qué sería, si no, de la Medicina, la más hermosa de las profesiones seglares?.

Precisamente, nunca ha sido tan necesaria la relación directa con el enfermo, una medicina del cuerpo y del alma, de la Persona entera, como ante el hombre de hoy, lleno de problemas que no existían para sus antepasados. Por eso, la Medicina Psicosomática, en creciente desarrollo en la post-guerra –aplicada cuando menos en sus principios fundamentales, sin exageraciones de secta- es necesaria en esta época para suplir con métodos científicos la función que empíricamente cumplía con sus pobres medios materiales y su profunda formación humanística el prototipo de médico tradicional a que nos hemos referido anteriormente.

No hay motivo para el pesimismo, La Medicina está en fase de transición, y al final de esta fase crítica se abrirán nuevos y prometedores senderos para las actividades

de las jóvenes generaciones médicas. Un día, el médico tendrá que saltar de “empleado de la colectividad”, a gran consultor sobre sus destinos, a colaborar de manera fundamental y decisiva en el futuro del hombre.

## **VIEJOS Y JÓVENES**

Siempre existió la lucha de una generación con otra. La que se va no quiere ir y la que llega no tiene tiempo que perder. Como dice el Premio Nobel Asturias, este relevo de centinelas se hacía antes por imperativos biológicos, sin sacrificio. Había un ritmo. Se destruía el pasado para crear el futuro, pero con una base sólida de equilibrio.

Los cambios sobrevenidos no podían dejar de influir en esta lucha generacional. El bienestar apetecido y no logrado, junto al nivel de vida ambiental creciente, no son el mejor caldo de cultivo para estimular un espíritu de sacrificio en jóvenes con perspectivas de campo profesional estrecho; y las relaciones humanas han cambiado de tal forma que el conflicto generacional alcanza caracteres catastróficos. Paradójicamente, la Ciencia se ha esforzado en prolongar la vida de los mayores y en acelerar el despertar de los menores, lo que no facilita el relevo.

El diálogo es duro. Los viejos arguyen: “La veteranía es un grado”. Los jóvenes contestan desdeñosos: “La experiencia es un candil colocado en la espalda, que sólo alumbra el pasado”. Hace unos años, en un banquete con que celebraban el acceso al puesto los nuevos Agregados de la Facultad de Medicina de París, uno de los comensales se levantó a brindar “porque desaparezcan pronto los viejos” (y lo de “desaparecer” es un eufemismo; el verbo era aún más cruel). En los sucesos del pasado mayo se oyeron gritos semejantes.

No resulta aventurado afirmar que la Universidad está anticuada después de leer estas declaraciones de un ministro español: “Los muchos acontecimientos acaecidos en todo el mundo y en nuestro país demuestran palpablemente que la Universidad necesita de radical transformación que ataque a fondo las causas de la actual situación de la enseñanza superior”; y las del Rector de Madrid hace pocos días: “La Universidad no es ya el cerebro y el alma de la vida cultural española”.

Aunque agudizada últimamente, la decadencia viene de lejos. Desde hace siglos, modificaciones cada vez más autoritarias plasmaron en los reglamentos de Napoleón, a quien se atribuyen estas palabras: “Mi fin principal al establecer un cuerpo docente es tener un medio de dirigir las opiniones políticas y sociales”; se creó así una Universidad centralizada, burocrática y jerárquica, copiada del modelo francés principalmente en España, Italia y Alemania. De ahí nació S.M. el catedrático, que dijo Unamuno, y el “Herr Profesor”, que no tenía nada que envidiar en majestad a su colega español.

Todos debemos recordar y recordamos con reverencial agradecimiento a excelentes catedráticos, y del propio Unamuno es también esta otra frase: “¿De dónde, sino de la Universidad salieron los más de los mejores?”. Pero los defectos de la enseñanza se han hecho cada vez más evidentes por la evolución de la Ciencia y la liberación de los espíritus. Escribe un catedrático de Medicina: “Muchas veces el único contacto directo entre profesores y alumnos es el momento de recoger la papeleta del examen”. El ex-Rector Tovar escribe este año: “Es inaceptable una Universidad Multitudinaria con el viejo método individualista del profesor dando su conferencia ante centenares de estudiantes con escasos o ningún colaborador competente en la enseñanza”. El actual Rector de Salamanca se quejaba hace dos años de no disponer sino de 40 camas para explicar Patología Médica a cuatrocientos alumnos, y diez años antes no disponía más que de ocho camas.

Sobretudo desde hace años llueven los reproches contra la Universidad. No son menores ni menos justificados los de la Universidad contra la sociedad. Esta contrapartida la plantea de forma plausible hace unos días el profesor Botella al decir: “Creo que todos somos responsables, todos los que estamos dentro de la Universidad. Pero también los de fuera de ella. Porque, ¿qué ha hecho hasta ahora la sociedad española a la Universidad? No tenemos ni hemos tenido nunca los elementos más indispensables para cumplir con la sociedad como nosotros sabemos que tenemos que cumplir”. Nada más cierto que esta afirmación del Rector de Madrid. Los donativos para beneficencia son en España bastante generosos; para enseñanza e investigación, rarísimos. Es frecuente entre nosotros calificar de materialistas a los norteamericanos, pero poca gente conoce aquí las enormes sumas que regalan a las Universidades, así están a tanta altura sobre las europeas.

- Promover no sólo las acostumbradas finalidades universitarias –enseñar una profesión, extender la cultura, estimular la investigación- sino la formación, además de sólido criterio personal y social en el estudiante.
- Ampliar la enseñanza de materias básicas a cambio de flexible reducción de las menos fundamentales, de modo que el licenciado pueda adaptarse sin gran esfuerzo a las rápidas transformaciones previsibles en un porvenir próximo, con la ayuda de cursos para post-graduados.
- Multiplicar el personal docente.
- Movilizar todos los hospitales en torno a las Facultades de Medicina para la enseñanza clínica.

### **Aumento de estudiantes**

Una de las causas que han conducido a este estado de cosas es el aumento de aspirantes a carreras universitarias en la post-guerra. A partir de los años 40 surge en toda Europa un cambio de la política educativa por la influencia del ejemplo americano. Mientras en 1943 el porcentaje de estudiantes universitarios oscilaba en Europa entre 10 y 25 por diez mil habitantes, en Estados Unidos era de 83.

Según nos ha comunicado el Rector de dicha Universidad, a nadie se le ocultan los inconvenientes de esta limitación de vocaciones con un examen poco detenido.

### **Escasez de enfermos**

Grave inconveniente para la enseñanza de la Medicina en España es la insuficiencia de la mayoría de los hospitales en proporción al número de alumnos. Una Facultad de Medicina es principalmente un buen hospital clínico, y en éste, ante todo y sobre todo, lo que tiene que haber son enfermos suficientes.

### **Los alumnos**

¿Son mejores o peores estudiantes los de ahora que los de antes?. Difícil y delicada cuestión, porque los llamados a opinar, necesariamente personas de edad avanzada, tienen tendencia a considerar que tiempos pasados fueron mejores. He aquí algunos juicios de personalidades especialmente calificadas, que expresan la tónica media entre muchas opiniones dispares.

Tenemos derecho de preferir nuestra época u otra cualquiera, y yo, sin querer molestar, prefiero la mía.

Usandizaga; “El estudiante es hoy muy superior al de otros tiempos en muchos aspectos: más serio y, por término medio, más estudioso, pero si se le observa más atentamente se percibe en la mayoría de ellos un español desinterés por la Medicina en sí y una excesiva preocupación por los aspectos económicos”.

Profundizando más sobre su psicología, el profesor Latorre dice que la juventud estudiantil actual tiene una actitud crítica y realista, desprecia la retórica huera y desconfía de las emociones. Nada se logra con hablarle de “sacerdocio de la Medicina o del Derecho”.

“En mis clases de Norteamérica apenas puedo yo hablar tres minutos sin ser interrumpido. Aquí apenas se logra que un alumno hable. Es la culminación del esfuerzo para establecer una distancia entre el profesorado y los alumnos.

### **El acceso a la Universidad de los económicamente débiles**

Ha estado demasiado ligado a la situación económica de las familias, en vez de depender de la capacidad intelectual de los alumnos. Según publicación de Aranguren de este año, poco más del 1 % de estudiantes universitarios son hijos de obreros.

Es necesaria la concesión de creciente número de becas, no sólo por razones de orden superior, como el bien común, sino por razón práctica muy concreta: convertir en rentable la mayor riqueza que un país tiene: la colosal suma de valores encerrados potencialmente en el gran conjunto de individuos ahora privados de las oportunidades que proporciona la educación.

### **El ámbito regional de la Universidad**

Decía un ministro el pasado agosto refiriéndose a la Universidad de Bilbao: “Alrededor de la Universidad surgirán aspiraciones e inquietudes intelectuales de todo orden y en definitiva, un más intenso intercambio entre el saber y las más variadas formas de la vida de la región”. El ministro de Educación y Ciencia ha dicho hace pocos días que se ha iniciado la ruptura de la Universidad burocrática, que estaba sujeta a una planificación y división territorial semejante a los organismos de la Administración Civil del Estado.... En vez de responder más al aire libre y natural pulso de la sociedad.

Opinando sobre el mismo tema, Salvador Madariaga apunta que cada Universidad debe ser “el cerebro de una región y crearse y recrearse en ella”.

Más expresivo es aún Latorre, en su obra “Universidad y Sociedad”, bajo el título “La regionalización de la Universidad”. “Toda Universidad –dice- ha de tener naturalmente una preocupación a escala mundial y dentro de ella una especial atención a los problemas del país en su conjunto. Una Universidad de visión miope, con mentalidad de campanario, es la negación de su propia esencia. Pero la Universidad española, como la de otros países que siguieron al modelo francés, ha pecado de excesiva uniformidad que le ha dado un carácter impersonal, abstracto y desligado de su contorno... En Francia mismo, país de origen de la concepción uniforme y centralista, no realizan serios esfuerzos para que cada Universidad se vincule cada vez más al trozo del país en que vive. En nuestro país –concluye-, dada su variedad económica, social y cultural, tal vinculación parece imprescindible si se quiere que la Universidad adquiera la eficacia y la resonancia social que todos deseamos para ella”.

A todos nos ha llenado de gozo y agradecimiento la concesión de la Universidad a Bilbao. La satisfacción hubiera sido aún mayor caso de haber sido más numerosas las Facultades concedidas, y así se hubieran extendido éstas, además de a Vizcaya y a Santander, a Guipúzcoa y a Álava, manteniendo Bilbao, con su Rectorado, el centro de influencia cultural sobre una zona de amplitud considerable. Lo más importante se ha logrado. Es de esperar que todo se alcance gradualmente.

Termino leyendo las dos principales conclusiones de la última asamblea de la “Federación Panamericana de Asociaciones de Facultades de Medicina” de la que forman parte todos los países del continente americano:

- “La educación médica no podrá ser en un futuro próximo un monopolio del Estado por motivos económicos y técnicos.
- Todos los Centros hospitalarios importantes del país podrán y deberán colaborar en esta obra sanitaria, no sólo facilitando el material clínico de que disponen, sino ofreciendo también la colaboración de su personal médico, el cual podrá cumplir una misión docente tan importante como la del personal docente de la Facultad.



¡Ojalá que los dirigentes de la Universidad de Bilbao logren aunar la indispensable ayuda estatal en profesores y recursos económicos con el aprovechamiento de las condiciones de preparación y experiencia de muchos de nuestros médicos y de numerosas de las instalaciones sanitarias vizcaínas!.

Termino pidiendo al Presidente disculpe mis atrevidas incursiones en su terreno y dando gracias a Vds. por haberme escuchado con inmerecida benevolencia.

No me compete opinar sobre los mil problemas sociológicos, económicos, administrativos y sanitarios que plantea la asistencia socializada. Desde el punto de vista de la orientación de esta charla lo único digno de anotarse es el claro conflicto entre la socialización y la tendencia cada vez más personalista de la patología actual con el consiguiente deterioro de la relación entre el médico y el enfermo. Aquel modo de ejercer la profesión por nuestros antecesores, aquella fórmula que hacía que el médico y el enfermo se convirtieran tantas veces en amigos, se va reformando cada vez más al inmiscuirse entre ambos un tercer factor, fruto de la socialización.

Hoy comenta un editorialista
